# Supplementary material for: MUC1-C activates the PBAF chromatin remodeling complex in integrating redox balance with progression of human prostate cancer stem cells
Source: PubMed Central journal article supplement (PMC8321896; doi:10.1038/s41388-021-01899-y), 2021-06-23
Supplement: 41388_2021_1899_MOESM1_ESM.pdf [file 41388_2021_1899_MOESM1_ESM.pdf]

**A. DU-145**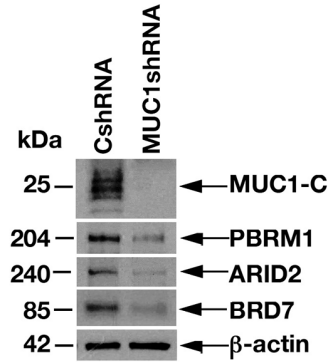**B. BT-549**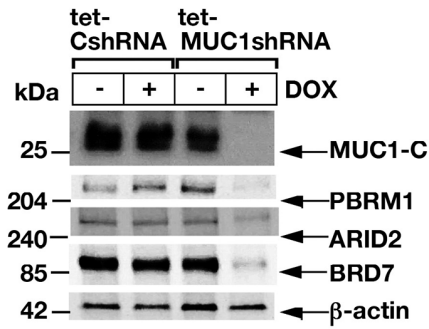**C. SW620**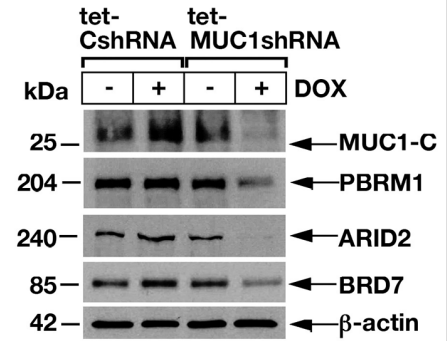**D.**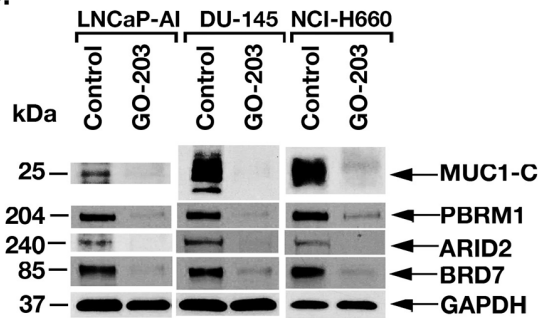**E. LNCaP/tet-MUC1-C(AQA)**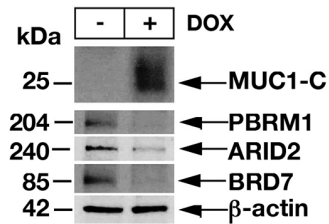

**Supplemental Figure S1. Targeting MUC1-C downregulates PBRM1, ARID2 and BRD7 expression in human cancer cells.** **A.** Lysates from DU-145/CshRNA and DU-145/MUC1shRNA cells were immunoblotted with antibodies against the indicated proteins. **B and C.** Lysates from BT-549/tet-CshRNA and BT-549/tet-MUC1shRNA (**B**) or SW620/tet-CshRNA and SW620/tet-MUC1shRNA (**C**) cells treated with vehicle or DOX for 7 days were immunoblotted with antibodies against the indicated proteins. **D.** Lysates from LNCaP-AI, DU145 and NCI-H660 cells treated with 5  $\mu$ M GO-203 for 2 days were immunoblotted with antibodies against the indicated proteins. **E.** Lysates from LNCaP/tet-MUC1-C(AQA) cells treated with vehicle or DOX for 7 days were immunoblotted with antibodies against the indicated proteins.

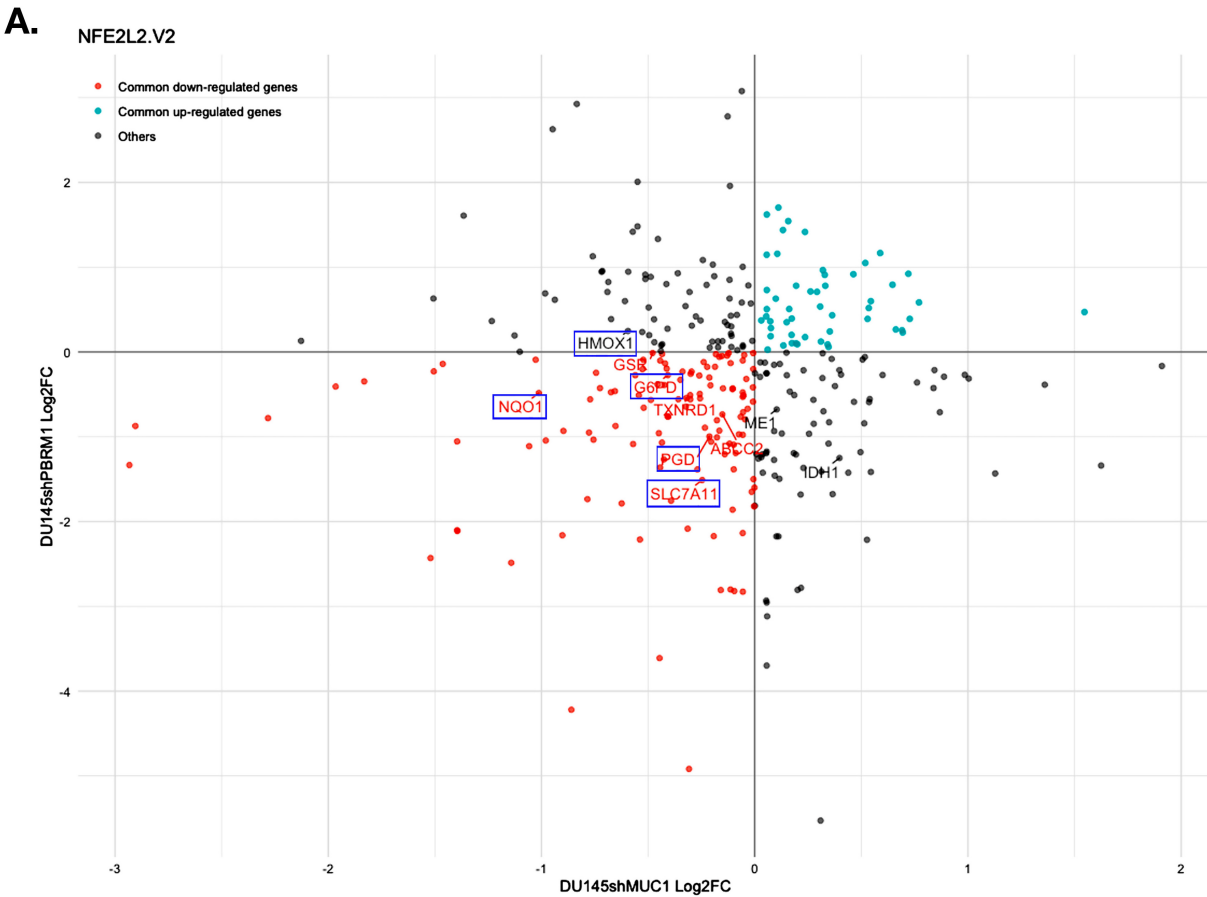

**B. DU-145/tet-MUC1shRNA**

**C. DU-145**

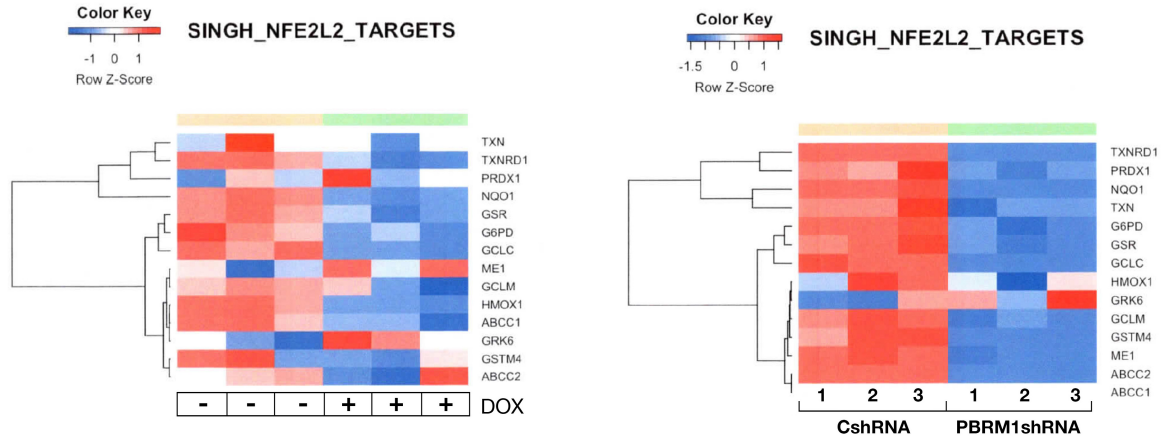

**Supplemental Figure S2. MUC1-C and PBRM1 activate NRF2 gene signatures.** **A.** Overlap of down- and up-regulated genes in DU-145 cells with MUC1-C and PBRM1 silencing obtained from GSEA of the NFE2L2.V2 gene signature. Highlighted in the blue boxes are key NRF2-induced antioxidant genes. **B and C.** Heatmaps of MUC1-C (**B**) and PBRM1 (**C**) regulated genes identified from GSEA of the SINGH NFE2L2 TARGETS gene signature.

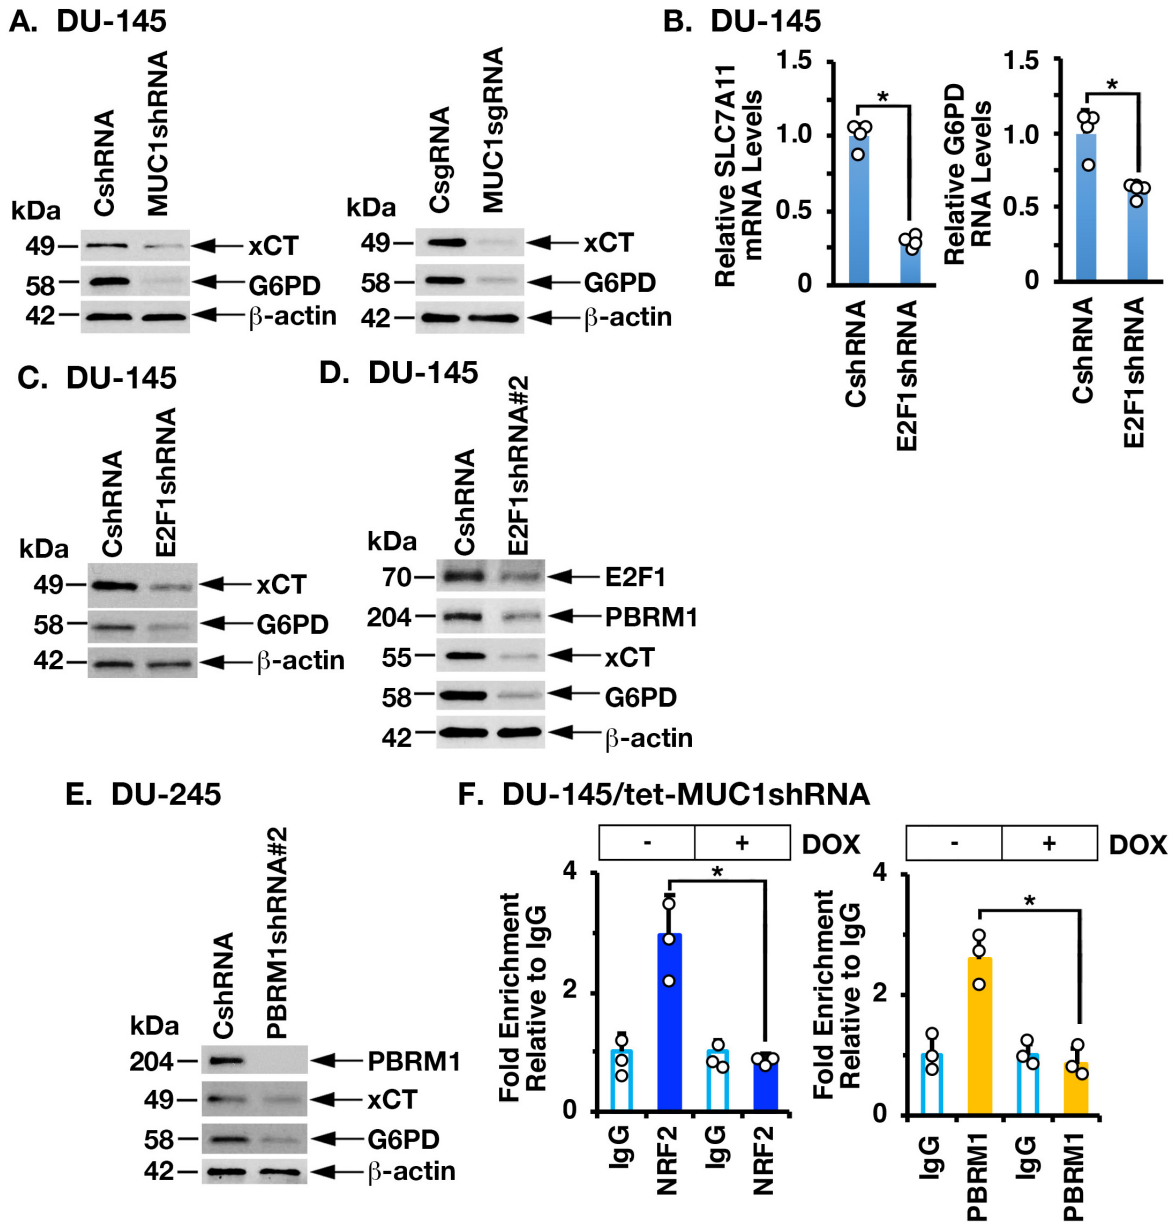

**Supplemental Figure S3. Silencing E2F1 downregulates SLC7A11 and G6PD expression.** **A.** Lysates from DU-145/CshRNA and DU-145/MUC1shRNA (left) or DU-145/CsgRNA and DU-145/MUC1sgRNA (right) cells were immunoblotted with antibodies against the indicated proteins. **B.** DU-145/CshRNA and DU-145/E2F1shRNA cells were analyzed for the indicated mRNA levels by qRT-PCR. The results (mean±SD of 3 determinations) are expressed as relative mRNA levels compared to that obtained for CshRNA cells (assigned a value of 1). **C.** Lysates were immunoblotted with antibodies against the indicated proteins. **D.** Lysates from DU-145/CshRNA and DU-145/E2F1shRNA#2 cells were immunoblotted with antibodies against the indicated proteins. **E.** Soluble chromatin from DU-145/tet-MUC1shRNA cells treated with vehicle or DOX for 7 days was precipitated with anti-NRF2 (left), anti-PBRM1 (right) or a control IgG. The DNA samples were amplified by qPCR with primers for the *G6PD*

promoter region. The results (mean±SD of 3 determinations) are expressed as fold enrichment relative to that obtained with the IgG control (assigned a value of 1).

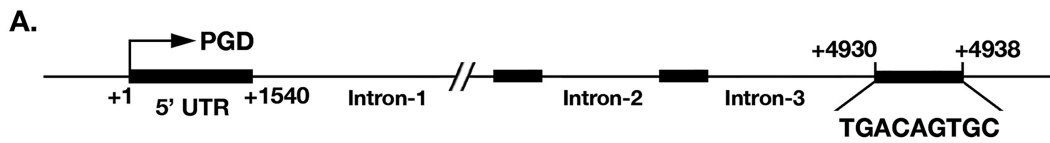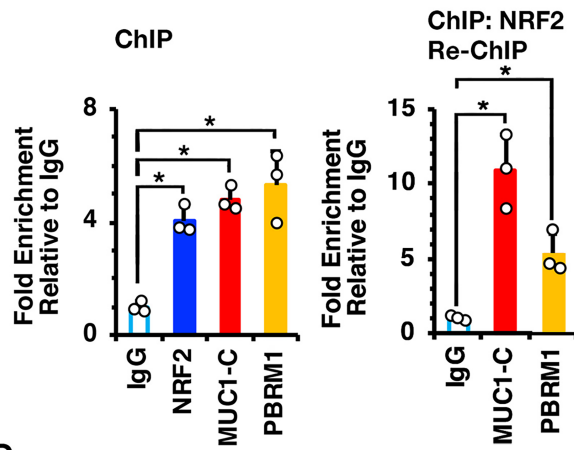

**B. pPGD**

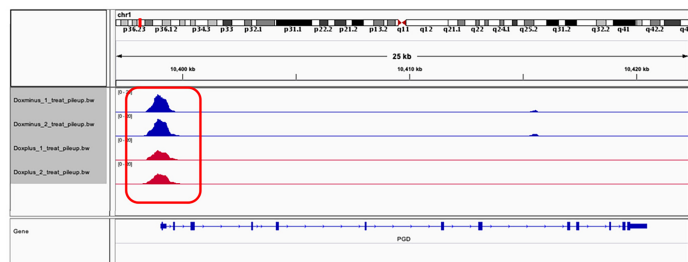

**C. DU-145/tet-MUC1-C**

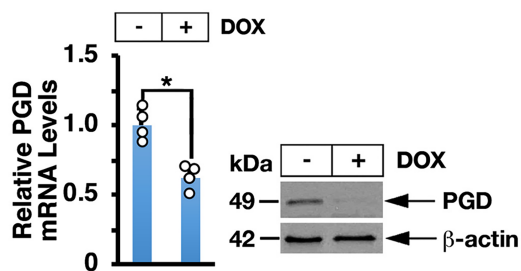

**D. DU-145**

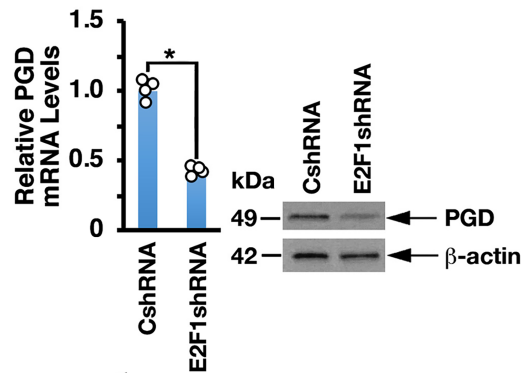

**E. DU-145**

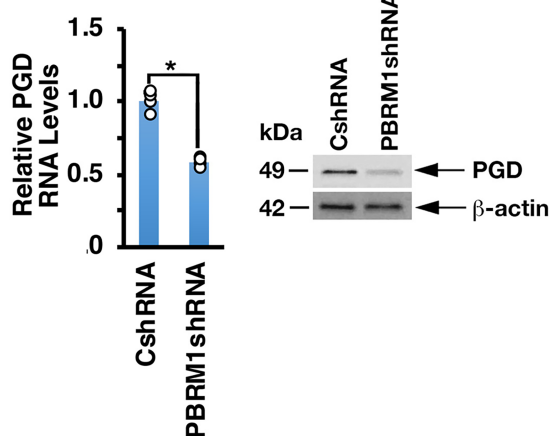

**Supplemental Figure S4. MUC1-C and PBRM1 activate the *PGD* gene.**

**A.** Schema of the *PGD* promoter region with highlighting of the NRF2 binding site in intron-3. Soluble chromatin from DU-145 cells was precipitated with anti-NRF2, anti-MUC1-C, anti-PBRM1 or a control IgG (left). Soluble chromatin from DU-145 cells was precipitated with anti-NRF2 (ChIP) and then reprecipitated with anti-MUC1-C, anti-PBRM1 or a control IgG (re-ChIP)(right). The DNA samples were amplified by qPCR with primers for the *PGD* promoter region. The results (mean $\pm$ SD of 3 determinations) are expressed as fold enrichment relative to that obtained with the IgG control (assigned a value of 1). **B.** Chromatin from DU-145/tet-MUC1shRNA cells treated with vehicle or DOX for 7 d was analyzed for ATAC-seq. UCSC genome browser snapshot of ATAC-seq data from the *PGD* gene showing loss of peaks and decrease in chromatin accessibility as a function of MUC1-C silencing. **C-E.** DU-145/tet-MUC1shRNA cells treated with vehicle or DOX for 7 days (**C**), DU-145/CshRNA and DU-145/E2F1shRNA (**D**) or DU-145/CshRNA and DU-145/PBRM1shRNA (**E**) cells were analyzed for *PGD* mRNA levels by qRT-PCR. The results (mean $\pm$ SD of 4 determinations) are expressed as relative mRNA levels compared to that obtained for CshRNA cells (assigned a value of 1)(left). Lysates were immunoblotted with antibodies against the indicated proteins (right).

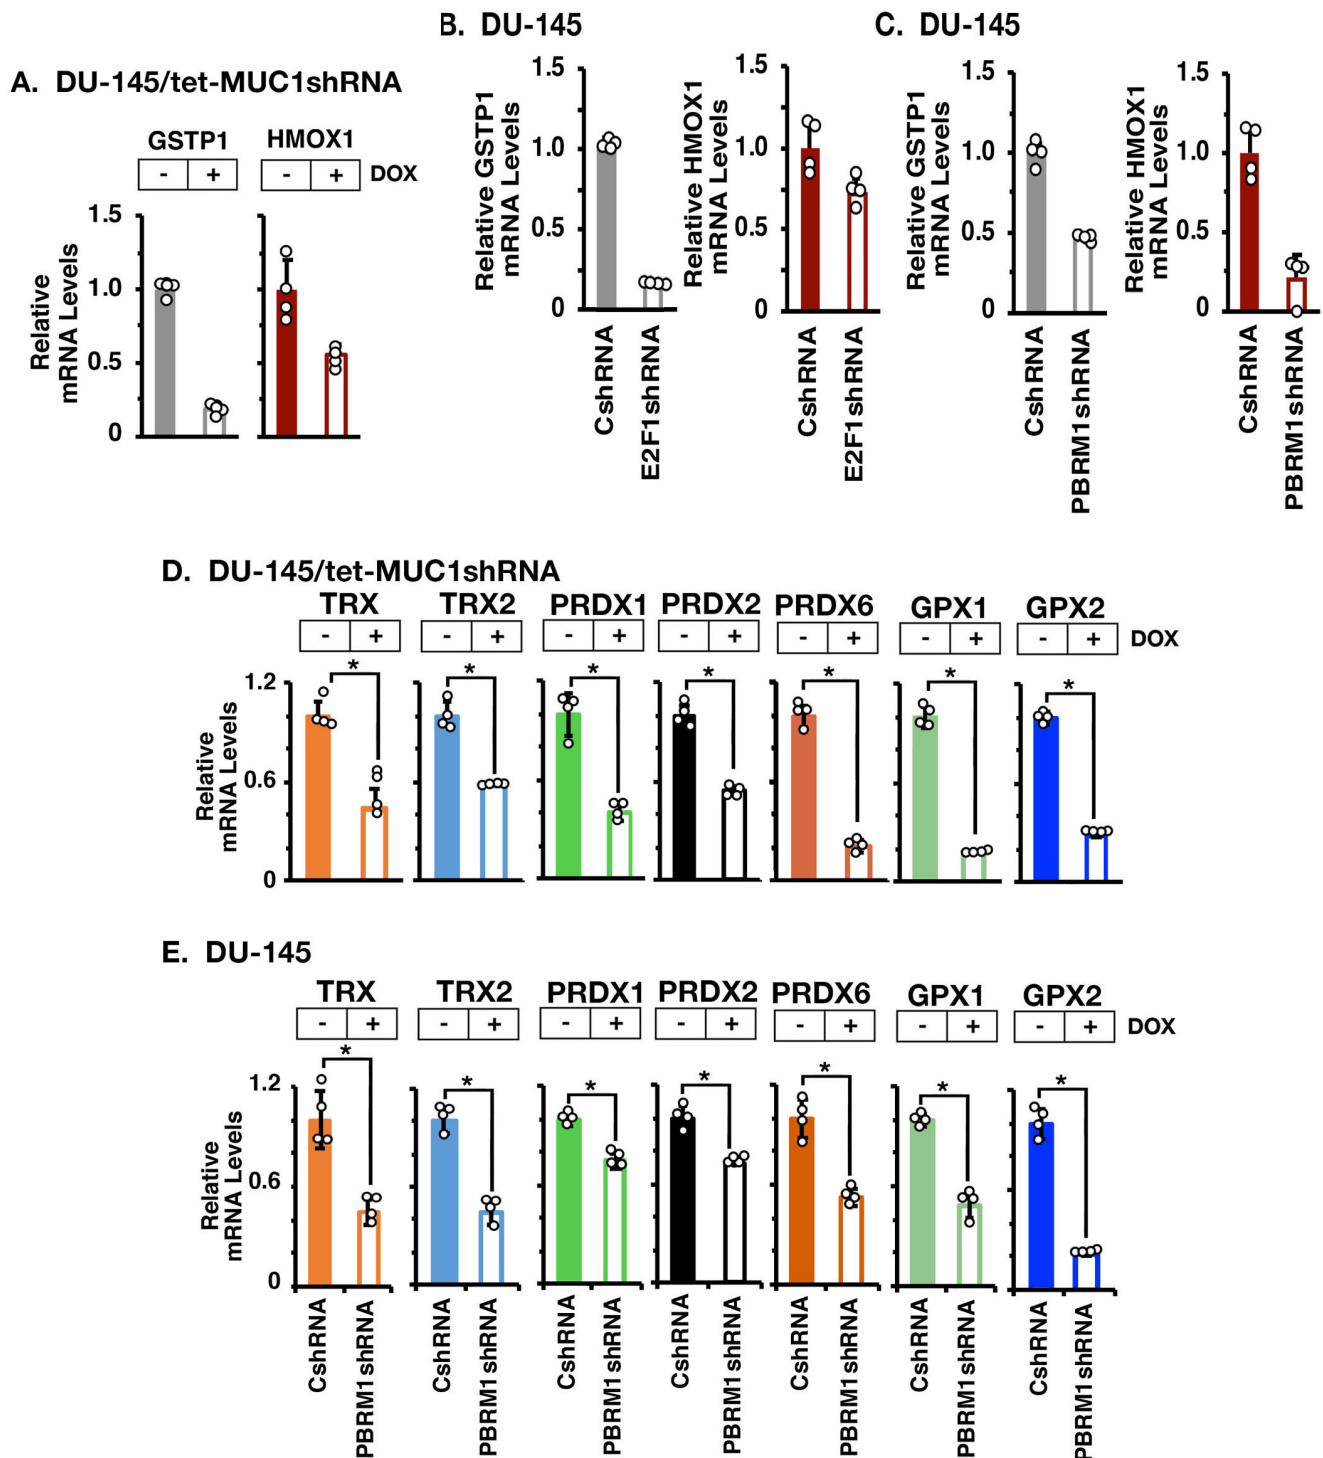

**Supplemental Figure S5. MUC1-C, E2F1 and PBRM1 drive NRF2 target antioxidant genes.** **A.** DU-145/tet-MUC1shRNA cells treated with vehicle or DOX for 7 days were analyzed for the indicated mRNA levels by qRT-PCR. The results (mean±SD of 4 determinations) are expressed as relative mRNA levels compared to that obtained for vehicle-treated cells (assigned a value of 1). **B and C.** DU-145/CshRNA, DU-145/E2F1shRNA (**B**) and DU-145/PBRM1shRNA (**C**) cells were analyzed for

the indicated mRNA levels by qRT-PCR. The results (mean±SD of 4 determinations) are expressed as relative mRNA levels compared to that obtained for CshRNA cells (assigned a value of 1). **D.** DU-145/tet-MUC1shRNA cells treated with vehicle or DOX for 7 days were analyzed for the indicated mRNA levels by qRT-PCR. The results (mean±SD of 4 determinations) are expressed as relative mRNA levels compared to that obtained for vehicle-treated cells (assigned a value of 1). **E.** DU-145/CshRNA and DU-145/PBRM1shRNA cells were analyzed for the indicated mRNA levels by qRT-PCR. The results (mean±SD of 4 determinations) are expressed as relative mRNA levels compared to that obtained for CshRNA cells (assigned a value of 1).



**A. DU-145**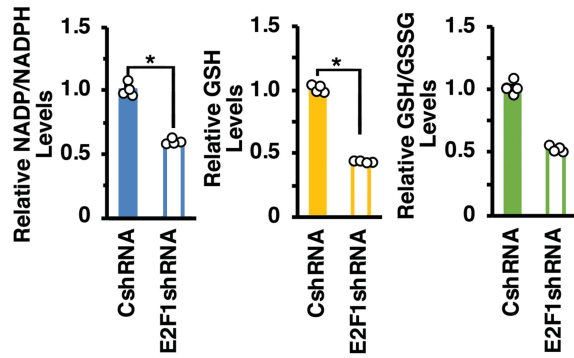**B. DU-145**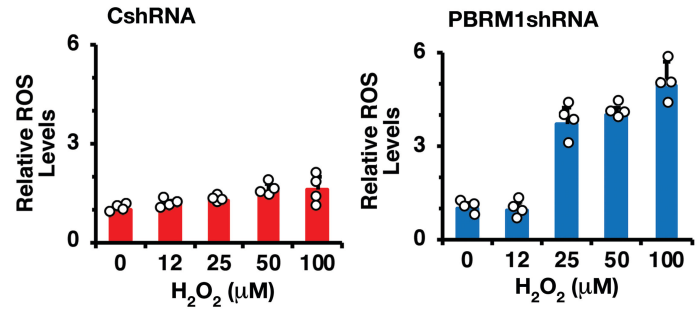

**Supplemental Figure S6. Effects of silencing E2F1 and PBRM1 on redox balance.** **A.** DU-145/CshRNA and DU-145/E2F1shRNA cells were analyzed for NADP/NADPH (left), GSH (middle) and GSH/GSSG (right) levels. The results (mean±SD of 4 determinations) are expressed as relative levels compared to that obtained for CshRNA cells (assigned a value of 1). **B.** DU-145/CshRNA (left) and DU-145/PBRM1shRNA (right) cells were incubated with the indicated H<sub>2</sub>O<sub>2</sub> concentrations for 1 hour and analyzed for ROS levels. The results (mean±SD of 4 determinations) are expressed as relative ROS levels compared to that obtained for control cells (assigned a value of 1).

**Supplemental Tables**

**Table S1. Primers used for qRT-PCR.**

|                |            |                           |
|----------------|------------|---------------------------|
| <b>MUC1-C</b>  | <b>FWD</b> | TACCGATCGTAGCCCCTATG      |
|                | <b>REV</b> | CTCACCAGCCCAAACAGG        |
| <b>PBRM1</b>   | <b>FWD</b> | AAGAAGAAAGAGCTTGCCAG      |
|                | <b>REV</b> | TCTCGAGCTTCAAGAACAAC      |
| <b>ARID2</b>   | <b>FWD</b> | GCAGCCAATTTCCACTCCTGTTG   |
|                | <b>REV</b> | GATTGGTGACAGGAGTCCTCTG    |
| <b>BRD7</b>    | <b>FWD</b> | CAAGCTCTTTAGCCAAACAAGAA   |
|                | <b>REV</b> | TCATTCCTGAGTGCAACAGC      |
| <b>E2F1</b>    | <b>FWD</b> | TATGGTGATCAAAGCCCCTC      |
|                | <b>REV</b> | AGATGATGGTGGTGGTGACA      |
| <b>SLC7A11</b> | <b>FWD</b> | CCATGAACGGTGGTGTGTT       |
|                | <b>REV</b> | GACCCTCTCGAGACGCAAC       |
| <b>G6PD</b>    | <b>FWD</b> | TGCCTTCCATCAGTCGGATACA    |
|                | <b>REV</b> | TGGTGGGGTAGATCTTCTTCTTGG  |
| <b>PGD</b>     | <b>FWD</b> | GGCTTTGTGGTCTGTGCTTT      |
|                | <b>REV</b> | AAATCATCCACAGCTTGCCC      |
| <b>GSTP1</b>   | <b>FWD</b> | ACCCAGGGCTCTATGGGAA       |
|                | <b>REV</b> | TGAGGGCACAGAAGCCCT        |
| <b>HMOX1</b>   | <b>FWD</b> | CAGCATGCCCCAGGATTTG       |
|                | <b>REV</b> | AGCTGGATGTTGAGCAGGA       |
| <b>TRX</b>     | <b>FWD</b> | CGCGGATCCATGGTGAAGCAGATCG |
|                | <b>REV</b> | CCGCTCGAGTTAGACTAATTCATTA |
| <b>TRX2</b>    | <b>FWD</b> | CGCGGATCCATGGCTCAGCGACTTC |
|                | <b>REV</b> | CCGCTCGAGTCAGCCAATCAGCTTC |
| <b>PRDX1</b>   | <b>FWD</b> | TTTGGTATCAGACCCGAAGC      |
|                | <b>REV</b> | TCCCCATGTTTGTCAGTGAA      |
| <b>PRDX2</b>   | <b>FWD</b> | GTCCGTGCGTCTAGCCTTT       |
|                | <b>REV</b> | TCCCTTTGTAGTCCGACAGC      |
| <b>PRDX6</b>   | <b>FWD</b> | GGACGTGGCTCCCAACTTT       |
|                | <b>REV</b> | CGAGGGTGGGAGAAGAGAATG     |

|              |            |                          |
|--------------|------------|--------------------------|
| <b>GPX1</b>  | <b>FDW</b> | AAGGTACTACTTATCGAGAATGTG |
|              | <b>REV</b> | GTCAGGCTCGATGTCAATGGTCTG |
| <b>GPX2</b>  | <b>FWD</b> | GACACGAGGAAACCGAAGCA     |
|              | <b>REV</b> | GGCCCTTCACAACGTCT        |
| <b>GAPDH</b> | <b>FWD</b> | CCATGGAGAAGGCTGGGG       |
|              | <b>REV</b> | CAAAGTTGTCATGGATGACC     |

**Table S2. Primers used for ChIP-qPCR.**

|                 |            |                          |
|-----------------|------------|--------------------------|
| <b>pPBRM1</b>   | <b>FWD</b> | ACTTTCTCACAGCTGCACTC     |
|                 | <b>REV</b> | GCGGGAAAGTCTGGGTTAAT     |
| <b>pARID2</b>   | <b>FWD</b> | GAGCTTCCTTTCCCTTCAGAG    |
|                 | <b>REV</b> | CCGGTTGTTCCAGGGTTAG      |
| <b>pBRD7</b>    | <b>FWD</b> | CAAGAAGCACAAGAAGCACAAG   |
|                 | <b>REV</b> | CACTGGGAAAGAGCGGAAG      |
| <b>pSLC7A11</b> | <b>FWD</b> | TTGACTATGCCCTGACACATTAG  |
|                 | <b>REV</b> | ACAGGAAGCCATCTTCTTTCTC   |
| <b>pG6PD</b>    | <b>FWD</b> | CCTGGGTTCAAGCGATTCT      |
|                 | <b>REV</b> | GGTGAAACTCCGTCTCTACTAAC  |
| <b>pPGD</b>     | <b>FWD</b> | GCGAGACTCCGTCTCAAATAA    |
|                 | <b>REV</b> | ATCTACCTACAGCACACCAAC    |
| <b>GAPDH</b>    | <b>FWD</b> | TACTAGCGGTTTTACGGGCG     |
|                 | <b>REV</b> | TCGAACAGGAGGAGCAGAGAGCGA |
